# Supplementary material
Source: publisher figshare collection journal article supplement (https://acs.figshare.com/ndownloader/files/14597327)
Supplement: Supplementary file 1 [file 14597327]

**Supporting Information for:**

**Thermodynamic Features of Perfectly Crystalline Poly(3-hexylthiophene)**

**Revealed Through Studies of Imperfect Crystals**

Mina Alizadehaghdam<sup>a,b</sup>, Barbara Heck<sup>c</sup>, Silvia Siegenführ<sup>c</sup>, Farhang Abbasi<sup>a,b,\*</sup>, Günter  
Reiter<sup>c,\*</sup>

<sup>a</sup> Institute of Polymeric Materials, Sahand University of Technology, Tabriz, Iran

<sup>b</sup> Faculty of Polymer Engineering, Sahand University of Technology, Tabriz, Iran

<sup>c</sup> Physikalisches Institut, Albert-Ludwigs-Universität Freiburg, Hermann-Herder-Straße 3, 79104 Freiburg, Germany

Corresponding Authors

\*E-mails: f.abbasi@sut.ac.ir, guenter.reiter@physik.uni-freiburg.de

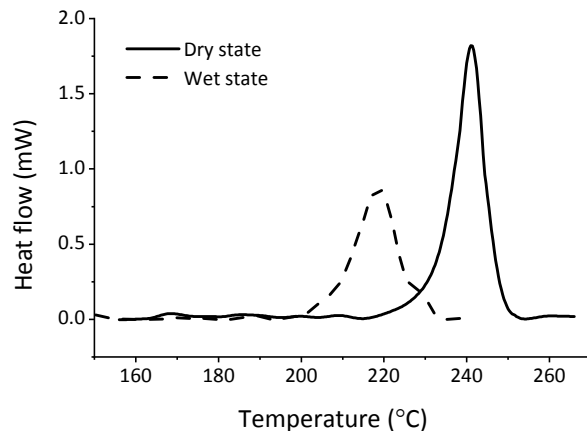

**Figure S1.** DSC heating curves for P3HT crystals prepared in the presence of 13 vol% 3HT. The samples were crystallized by cooling from the solution state (at 260 °C) to 25 °C at a cooling rate of (2 °C/min). Then, (dashed curve) the crystallized sample was directly heated (with the rate of 20 °C/min) to determine the “wet melting temperature” or (solid curve) the DSC pan was opened and the diluent was evaporated by heating at 100 °C for 30 min, the crystalline film was then transferred to a new DSC pan. The pan was sealed and heated (with the rate of 20 °C/min) to determine the “dry melting temperature” of the P3HT crystals. The curves are baseline subtracted. The mass of P3HT was 4 mg for both cases.

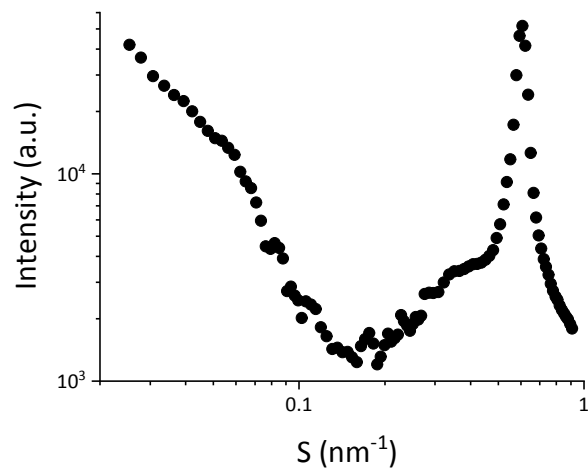

**Figure S2.** SAXS pattern of P3HT crystallized by cooling the sample slowly at  $1^\circ\text{C}/\text{min}$  from the melt at  $260^\circ\text{C}$  to room temperature (slowly cooled sample in Table 2). The sharp peak at around ( $S = 0.6 \text{ nm}^{-1}$ ) represents the (100) Bragg peak, associated with the layers of  $\pi$ -stacked polythiophene backbones separated by layers of 3-hexyl side chains (period of  $d_{100} = 1.67 \text{ nm}$  in the a-direction).
